# Supplementary material for: Alterations of Endogenous Hormones, Antioxidant Metabolism, and Aquaporin Gene Expression in Relation to γ-Aminobutyric Acid-Regulated Thermotolerance in White Clover
Source: MDPI journal article supplement (doi:10.3390/antiox10071099), 2021-07-08
Supplement: s1 [file s1]

**Table S1.** Primer sequences used in qRT-PCR.

| Target gene     | Accession No. | Forward primer (5'-3')    | Reverse primer (5'-3')    | Tm/°C |
|-----------------|---------------|---------------------------|---------------------------|-------|
| <i>Cu/ZnSOD</i> | JQ321597.1    | AACTGTGTACCACGAGGACTTC    | AGACTAACAGGTGCTAACAACG    | 58    |
| <i>FeSOD</i>    | KP202173      | ACACGATTTCTCAGGGTTACGAC   | GCGGCCAAGACTATCAGTTCCAT   | 58    |
| <i>MnSOD</i>    | JQ321598.1    | TAAGGGAACCTACCCGATAACT    | CCAGGACCAAACGTCACCAAAG    | 66    |
| <i>CAT</i>      | JQ321596.1    | AACAGGACGGGAATAGCACG      | ACCAGGTTTCAGACACGGAGACA   | 58    |
| <i>POD</i>      | JQ321606.1    | CAC TTGGTTTAGTTTTGTGCGCC  | AACACGGTCTTGTCTGCTACG     | 64    |
| <i>APX</i>      | JQ321599.1    | TAAAGATAGTCAACCCACCTCAACA | ACCAGTCTTGGGAAACAACGTA    | 58    |
| <i>MR</i>       | KP202172      | CCAACTGCCTAAAGCCACATCT    | GAAGAAAGGAACTAACGGAGCAT   | 64    |
| <i>DR</i>       | KP202171      | TGGTTACCTCCCAGCCCTAT      | TCTTACCAAGGAACCTTTAGTCAGG | 58    |
| <i>GR</i>       | JQ321602.1    | TAAACTTCCACTCCCTTTCTATCG  | CTACAATATGGGTTGAGGACAGGT  | 58    |
| <i>PIP1-1</i>   | MF405356      | GTTCTTGTCTACACCGTATTCTCCG | CCAGTTCCAGTGATTGGGATAGTG  | 57    |
| <i>PIP2-2</i>   | MF405358      | TGAAACACCCTTACAACCACCTC   | TGCGCTTCTCTTTGGATCAGTAG   | 59    |
| <i>PIP2-7</i>   | MF405359      | TGATGGTTACAACAAAGGTACAGCT | AATCGGGATAGTAGCCAAGTGAA   | 57    |
| <i>SIP1-1</i>   | MF405360      | CTACCTGGCTTATTCATCACAACAA | CGCCTATTGCTTGAGCTGGA      | 57    |
| <i>TIP1-1</i>   | AJ243309.1    | AGTGGGTCCCGCTTTGGTGT      | CATGGATGCTCCGGTGAAGG      | 57    |
| <i>TIP2-1</i>   | MF405362      | AGATGCAGCACTTGATCCAGC     | CCAAAGGTGACAGCAGGGTTA     | 57    |
| <i>TIP2-2</i>   | MF405363      | GGAGTGGCTGCTGGATTGAA      | ATGGACCGGCTGCTAAGATG      | 57    |
| <i>NIP1-2</i>   | KU598952      | TGAACCCAGTTAGAAGCCTAGGAC  | TCACGAACGGACTTGTTAGTGTATC | 61    |
| <i>NIP2-1</i>   | MF405354      | GTGCACACATGAATCCGGCT      | CTTTGATGGTTCTAACAACGCTCTA | 57    |
| <i>β-Actin</i>  | JF968419      | TTACAATGAATTGCGTGTTG      | AGAGGACAGCCTGAATGG        | 58    |
